# Supplementary material for: Perfluoroalkylated Substances (PFAS) Associated with Microplastics in a Lake Environment
Source: MDPI journal article supplement (doi:10.3390/toxics9050106), 2021-05-11
Supplement: s1 [file s1]

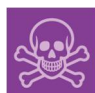

## Supplemental Section – Raw data and Quality Control reports

1

**Table S1 : Final Target Per- and polyfluoroalkyl Substances (PFAS) - Channel Waters**  
**Date Extracted: 05/09/2019**  
**Data Analyzed: 05/15/2019 & 08/05/19**  
**Matrix: Aqueous - Collected 5/7/2019**  
**Sample Prep: EPA Method 537**  
**Instrument: Waters Quattro Micro LC-Tandem Mass Spectrometer**

| Identification | Channel Water #1 | Channel Water #2 | Average | %RPD |
|----------------|------------------|------------------|---------|------|
|----------------|------------------|------------------|---------|------|

| Units | µg/L | µg/L | µg/L |  |
|-------|------|------|------|--|
|-------|------|------|------|--|

| Native PFAS                  |          |          |          |      |
|------------------------------|----------|----------|----------|------|
| Perfluorobutanesulfonic acid | 0.00072  | 0.00098  | 0.00085  | 31%  |
| Perfluorohexanoic acid       | < 0.0005 | < 0.0005 | < 0.0005 | NA   |
| Perfluoroheptanoic acid      | 0.00051  | 0.00037  | 0.00044  | 31%  |
| Perfluorooctanoic acid       | 0.0010   | 0.0013   | 0.0011   | 25%  |
| Perfluorononanoic acid       | < 0.0005 | < 0.0005 | < 0.0005 | NA   |
| Perfluorodecanoic acid       | < 0.0001 | < 0.0001 | < 0.0001 | NA   |
| Perfluorooctanesulfonic acid | 0.00040  | 0.00044  | 0.00042  | 9.4% |
| Sum Target PFAS              | 0.0026   | 0.0031   | 0.0028   | 16%  |

| Surrogate PFAS               |           |           |         | %RPD |
|------------------------------|-----------|-----------|---------|------|
|                              | %Recovery | %Recovery | Average |      |
| Perfluorobutanesulfonic acid | 71%       | 97%       | 84%     | 31%  |
| Perfluorohexanoic acid       | 95%       | 87%       | 91%     | 9.4% |
| Perfluoroheptanoic acid      | 59%       | 53%       | 56%     | 9.9% |
| Perfluorooctanoic acid       | 68%       | 60%       | 64%     | 13%  |
| Perfluorononanoic acid       | 68%       | 53%       | 61%     | 25%  |
| Perfluorodecanoic acid       | 46%       | 30%       | 38%     | 44%  |
| Perfluorooctanesulfonic acid | 51%       | 63%       | 57%     | 22%  |
| Average Surrogate Recovery   | 65%       | 63%       | 64%     | 22%  |

NA - Not Applicable

2

3

**Table S2 : Final Target Per- and polyfluoroalkyl Substances (PFAS) - Lake Waters**  
**Date Extracted: 05/09/2019**  
**Data Analyzed: 05/15/2019 & 08/05/19**  
**Matrix: Aqueous - Collected 5/7/2019**  
**Sample Prep: EPA Method 537**  
**Instrument: Waters Quattro Micro LC-Tandem Mass Spectrometer**

| Identification | Lake Water #1 | Lake Water #2 | Average | %RPD |
|----------------|---------------|---------------|---------|------|
|----------------|---------------|---------------|---------|------|

| Units | µg/L | µg/L | µg/L |  |
|-------|------|------|------|--|
|-------|------|------|------|--|

| Native PFAS                  |          |          |          |      |
|------------------------------|----------|----------|----------|------|
| Perfluorobutanesulfonic acid | 0.00093  | 0.00069  | 0.00081  | 30%  |
| Perfluorohexanoic acid       | < 0.0005 | < 0.0005 | < 0.0005 | NA   |
| Perfluoroheptanoic acid      | 0.00035  | 0.00039  | 0.00037  | 12%  |
| Perfluorooctanoic acid       | 0.0021   | 0.0017   | 0.0019   | 18%  |
| Perfluorononanoic acid       | < 0.0005 | < 0.0005 | < 0.0005 | NA   |
| Perfluorodecanoic acid       | < 0.0001 | < 0.0001 | < 0.0001 | NA   |
| Perfluorooctanesulfonic acid | < 0.0001 | 0.00040  | 0.00040  | NA   |
| Sum Target PFAS              | 0.0034   | 0.0032   | 0.0033   | 4.2% |

| Surrogate PFAS               | %Recovery | %Recovery | Average | %RPD |
|------------------------------|-----------|-----------|---------|------|
| Perfluorobutanesulfonic acid | 100%      | 88%       | 94%     | 13%  |
| Perfluorohexanoic acid       | 75%       | 66%       | 70%     | 14%  |
| Perfluoroheptanoic acid      | 58%       | 77%       | 68%     | 28%  |
| Perfluorooctanoic acid       | 60%       | 85%       | 72%     | 34%  |
| Perfluorononanoic acid       | 41%       | 81%       | 61%     | 65%  |
| Perfluorodecanoic acid       | 17%       | 51%       | 34%     | 99%  |
| Perfluorooctanesulfonic acid | 36%       | 50%       | 43%     | 34%  |
| Average Surrogate Recovery   | 55%       | 71%       | 63%     | 41%  |

NA - Not Applicable

**Table S3: Per- and polyfluoroalkyl Substances (PFAS) Quality Control Summary - Channel and Lake Water Samples**

| Identification               |         | Lake Water #2 |           | Channel Water #2 |      | Channel Water |           |
|------------------------------|---------|---------------|-----------|------------------|------|---------------|-----------|
|                              |         |               |           |                  |      |               |           |
|                              | µg/L    | µg/L          | %Recovery | %Recovery        | %RPD | %Recovery     | %Recovery |
| Perfluorobutanesulfonic acid | <0.0005 | <0.0005       | 104%      | 128%             | 23%  | 51%           |           |
| Perfluorohexanoic acid       | <0.0005 | <0.0005       | 111%      | 125%             | NC1  | 60%           |           |
| Perfluorheptanoic acid       | <0.0001 | <0.0001       | 105%      | 121%             | 4%   | 71%           |           |
| Perfluorooctanoic acid       | <0.0005 | <0.0005       | 116%      | 90%              | 15%  | 89%           |           |
| Perfluorononanoic acid       | <0.0005 | <0.0005       | 91%       | 129%             | NC1  | 80%           |           |
| Perfluorodecanoic acid       | <0.0001 | <0.0001       | 83%       | 123%             | NC1  | 42%           |           |
| Perfluorooctanesulfonic acid | <0.0001 | <0.0001       | 114%      | 130%             | 24%  | 55%           |           |
| Average Recovery & RPD       | NA      | NA            | 103%      | 121%             | 17%  | 64%           |           |
| Standard Deviation           | NA      | NA            | 12%       | 14%              | 56%  | 17%           |           |

NA - Not Applicable

NC1 - Not calculated, less than detection limit.



| Table S4 : Final Target Per- and polyfluoroalkyl Substances (PFAS) - Virgin Polyethylene |                                                              |
|------------------------------------------------------------------------------------------|--------------------------------------------------------------|
| Date Extracted: 03/19/2019                                                               | Matrix: Polyethylene (PE)                                    |
| Data Analyzed: 07/15/2019                                                                | Sample Prep: Solid-Liquid Extraction                         |
|                                                                                          | Instrument: Waters Quattro Micro LC-Tandem Mass Spectrometer |

| Identification | Virgin PE #1 | Virgin PE #2 | Average | %RPD |
|----------------|--------------|--------------|---------|------|
|----------------|--------------|--------------|---------|------|

| Units | ng/g | ng/g | ng/g |  |
|-------|------|------|------|--|
|-------|------|------|------|--|

| Native PFAS                  |            |            |            |    |
|------------------------------|------------|------------|------------|----|
| Perfluorobutanesulfonic acid | < 0.05     | < 0.05     | < 0.05     | NA |
| Perfluorohexanoic acid       | < 0.05     | < 0.05     | < 0.05     | NA |
| Perfluoroheptanoic acid      | < 0.05     | < 0.05     | < 0.05     | NA |
| Perfluorooctanoic acid       | < 0.05     | < 0.05     | < 0.05     | NA |
| Perfluorononanoic acid       | < 0.05     | < 0.05     | < 0.05     | NA |
| Perfluorodecanoic acid       | < 0.05     | < 0.05     | < 0.05     | NA |
| Perfluorooctanesulfonic acid | < 0.05     | < 0.05     | < 0.05     | NA |
| Sum Target PFAS              | Non-Detect | Non-Detect | Non-Detect | NA |

| Surrogate PFAS               |           |           |      |
|------------------------------|-----------|-----------|------|
|                              | %Recovery | %Recovery | %RPD |
| Perfluorobutanesulfonic acid | 91%       | 73%       | 22%  |
| Perfluorohexanoic acid       | 83%       | 91%       | 9.2% |
| Perfluoroheptanoic acid      | 88%       | 96%       | 8.7% |
| Perfluorooctanoic acid       | 94%       | 90%       | 4.9% |
| Perfluorononanoic acid       | 79%       | 84%       | 6.2% |
| Perfluorodecanoic acid       | 51%       | 51%       | 0.0% |
| Perfluorooctanesulfonic acid | 63%       | 58%       | 8.3% |
| Average Surrogate Recovery   | 78%       | 77%       | 8.5% |

NA - Not Applicable



**Table S5 : Final Target Per- and polyfluoroalkyl Substances (PFAS) - Virgin Polypropylene**  
**Matrix: Polypropylene (PP)**  
**Date Extracted: 03/12/2019**  
**Data Analyzed: 07/15/2019**  
**Sample Prep: Solid-Liquid Extraction**  
**Instrument: Waters Quattro Micro LC-Tandem Mass Spectrometer**

| Identification | Virgin PP #1 | Virgin PP #2 | Average | %RPD |
|----------------|--------------|--------------|---------|------|
|----------------|--------------|--------------|---------|------|

| Units | ng/g | ng/g | ng/g |  |
|-------|------|------|------|--|
|-------|------|------|------|--|

| Native PFAS                  |            |            |            |    |
|------------------------------|------------|------------|------------|----|
| Perfluorobutanesulfonic acid | < 0.05     | < 0.05     | < 0.05     | NA |
| Perfluorohexanoic acid       | < 0.05     | < 0.05     | < 0.05     | NA |
| Perfluoroheptanoic acid      | < 0.05     | < 0.05     | < 0.05     | NA |
| Perfluorooctanoic acid       | < 0.05     | < 0.05     | < 0.05     | NA |
| Perfluorononanoic acid       | < 0.05     | < 0.05     | < 0.05     | NA |
| Perfluorodecanoic acid       | < 0.05     | < 0.05     | < 0.05     | NA |
| Perfluorooctanesulfonic acid | < 0.05     | < 0.05     | < 0.05     | NA |
| Sum Target PFAS              | Non-Detect | Non-Detect | Non-Detect | NA |

| Surrogate PFAS               |     |     |     | %RPD  |
|------------------------------|-----|-----|-----|-------|
| Perfluorobutanesulfonic acid | 80% | 92% | 86% | 13%   |
| Perfluorohexanoic acid       | 83% | 79% | 81% | 4.3%  |
| Perfluoroheptanoic acid      | 88% | 81% | 84% | 8.9%  |
| Perfluorooctanoic acid       | 87% | 88% | 87% | 0.57% |
| Perfluorononanoic acid       | 93% | 82% | 87% | 13%   |
| Perfluorodecanoic acid       | 79% | 69% | 74% | 14%   |
| Perfluorooctanesulfonic acid | 75% | 63% | 69% | 18%   |
| Average Surrogate Recovery   | 83% | 79% | 81% | 10%   |

NA - Not Applicable

**Table S6 : Final Target Per- and polyfluoroalkyl Substances (PFAS) - Virgin Polyester**  
**IISG PFAS- Microplastics Study**  
**Date Extracted: 03/12/219**  
**Data Analyzed: 07/15/2019**  
**Matrix: Polypropylene (PET)**  
**Sample Prep: Solid-Liquid Extraction**  
**Instrument: Waters Quattro Micro LC-Tandem Mass Spectrometer**

| Identification | Virgin PET #1 | Virgin PET #2 | Average | %RPD |
|----------------|---------------|---------------|---------|------|
|----------------|---------------|---------------|---------|------|

| Units | ng/g | ng/g | ng/g |  |
|-------|------|------|------|--|
|-------|------|------|------|--|

| Native PFAS                  |            |            |            |    |
|------------------------------|------------|------------|------------|----|
| Perfluorobutanesulfonic acid | < 0.05     | < 0.05     | < 0.05     | NA |
| Perfluorohexanoic acid       | < 0.05     | < 0.05     | < 0.05     | NA |
| Perfluoroheptanoic acid      | < 0.05     | < 0.05     | < 0.05     | NA |
| Perfluorooctanoic acid       | < 0.05     | < 0.05     | < 0.05     | NA |
| Perfluorononanoic acid       | < 0.05     | < 0.05     | < 0.05     | NA |
| Perfluorodecanoic acid       | < 0.05     | < 0.05     | < 0.05     | NA |
| Perfluorooctanesulfonic acid | < 0.05     | < 0.05     | < 0.05     | NA |
| Sum Target PFAS              | Non-Detect | Non-Detect | Non-Detect | NA |

| Surrogate PFAS               |     |      |     |     |
|------------------------------|-----|------|-----|-----|
| Perfluorobutanesulfonic acid | 83% | 102% | 92% | 21% |
| Perfluorohexanoic acid       | 88% | 60%  | 74% | 37% |
| Perfluoroheptanoic acid      | 92% | 67%  | 79% | 31% |
| Perfluorooctanoic acid       | 94% | 67%  | 80% | 34% |
| Perfluorononanoic acid       | 98% | 77%  | 87% | 25% |
| Perfluorodecanoic acid       | 88% | 66%  | 77% | 28% |
| Perfluorooctanesulfonic acid | 81% | 93%  | 87% | 14% |
| Average Surrogate Recovery   | 89% | 76%  | 82% | 27% |

NA - Not Applicable

**Table S7: Per- and polyfluoroalkyl Substances (PFAS) Quality Control Summary - Virgin Plastics**

| Identification                    |       | .         | Virgin Polyethylene | Virgin Polyester | Virgin Polyester |
|-----------------------------------|-------|-----------|---------------------|------------------|------------------|
|                                   | ng/g  | %Recovery | %Recovery           | %RPD             | %Recovery        |
| Perfluorobutanesulfonic acid      | <0.05 | 93%       | 95%                 | NC1              | 104%             |
| Perfluorohexanoic acid            | <0.05 | 62%       | 84%                 | NC1              | 52%              |
| Perfluoroheptanoic acid           | <0.05 | 89%       | 78%                 | NC1              | 85%              |
| Perfluorooctanoic acid            | <0.05 | 91%       | 77%                 | NC1              | 85%              |
| Perfluorononanoic acid            | <0.05 | 68%       | 73%                 | NC1              | 83%              |
| Perfluorodecanoic acid            | <0.05 | 42%       | 71%                 | NC1              | 79%              |
| Perfluorooctanesulfonic acid      | <0.05 | 66%       | 70%                 | NC1              | 92%              |
| <b>Average Recovery &amp; RPD</b> | NA    | 73%       | 78%                 | NC1              | 83%              |
| <b>Standard Deviation</b>         | NA    | 19%       | 8.6%                | NA               | 16%              |

NA - Not Applicable

NC1 - Not calculated, less than detection limit.



|                                                                                                                                                                                                                                                                                         |  |  |  |
|-----------------------------------------------------------------------------------------------------------------------------------------------------------------------------------------------------------------------------------------------------------------------------------------|--|--|--|
| <b>Table S8 : Final Target Per- and polyfluoroalkyl Substances (PFAS) - Polyethylene Deployed for 1 Month - Channel Water</b><br><b>Matrix: Polyethylene (PE)</b><br><b>Sample Prep: Solid-Liquid Extraction</b><br><b>Instrument: Waters Quattro Micro LC-Tandem Mass Spectrometer</b> |  |  |  |
| Date Extracted: 5/6/2019                                                                                                                                                                                                                                                                |  |  |  |
| Data Analyzed: 8/29/2019                                                                                                                                                                                                                                                                |  |  |  |

| Identification | PE - Channel Water #1 | PE - Channel Water #2 | Average | %RPD |
|----------------|-----------------------|-----------------------|---------|------|
|----------------|-----------------------|-----------------------|---------|------|

| Units | ng/g | ng/g | ng/g |  |
|-------|------|------|------|--|
|-------|------|------|------|--|

| Native PFAS                  |        |        |        |      |
|------------------------------|--------|--------|--------|------|
| Perfluorobutanesulfonic acid | < 0.05 | < 0.05 | < 0.05 | NA   |
| Perfluorohexanoic acid       | 0.051  | 0.060  | 0.055  | 17%  |
| Perfluoroheptanoic acid      | 0.074  | 0.071  | 0.074  | 5.1% |
| Perfluorooctanoic acid       | 0.094  | 0.12   | 0.11   | 21%  |
| Perfluorononanoic acid       | < 0.05 | < 0.05 | < 0.05 | NA   |
| Perfluorodecanoic acid       | < 0.05 | < 0.05 | < 0.05 | NA   |
| Perfluorooctanesulfonic acid | < 0.05 | < 0.05 | < 0.05 | NA   |
| Sum Target PFAS              | 0.22   | 0.25   | 0.23   | 12%  |

| Surrogate PFAS               |      |      |      |      |
|------------------------------|------|------|------|------|
| Perfluorobutanesulfonic acid | 109% | 99%  | 104% | 10%  |
| Perfluorohexanoic acid       | 118% | 100% | 109% | 17%  |
| Perfluoroheptanoic acid      | 94%  | 99%  | 97%  | 5.2% |
| Perfluorooctanoic acid       | 106% | 77%  | 92%  | 32%  |
| Perfluorononanoic acid       | 67%  | 67%  | 67%  | 0.0% |
| Perfluorodecanoic acid       | 41%  | 26%  | 34%  | 45%  |
| Perfluorooctanesulfonic acid | 68%  | 57%  | 63%  | 18%  |
| Average Surrogate Recovery   | 86%  | 75%  | 81%  | 18%  |

NA - Not Applicable

**Table S9 : Final Target Per- and polyfluoroalkyl Substances (PFAS) - Polypropylene Deployed for 1 Month - Channel Water**  
**Matrix: Polypropylene (PP)**  
**Date Extracted: 5/6/2019**  
**Data Analyzed: 8/29/19**  
**Sample Prep: Solid-Liquid Extraction**  
**Instrument: Waters Quattro Micro LC-Tandem Mass Spectrometer**

| Identification | PP - Channel Water #1 | PP - Channel Water #2 | Average | %RPD |
|----------------|-----------------------|-----------------------|---------|------|
|----------------|-----------------------|-----------------------|---------|------|

| Units | ng/g | ng/g | ng/g |  |
|-------|------|------|------|--|
|-------|------|------|------|--|

| Native PFAS                  |        |        |        |     |
|------------------------------|--------|--------|--------|-----|
| Perfluorobutanesulfonic acid | < 0.05 | < 0.05 | < 0.05 | NA  |
| Perfluorohexanoic acid       | 0.092  | < 0.05 | 0.092  | NA  |
| Perfluoroheptanoic acid      | 0.20   | 0.095  | 0.20   | 52% |
| Perfluorooctanoic acid       | 0.13   | 0.10   | 0.12   | 24% |
| Perfluorononanoic acid       | < 0.05 | < 0.05 | < 0.05 | NA  |
| Perfluorodecanoic acid       | < 0.05 | < 0.05 | < 0.05 | NA  |
| Perfluorooctanesulfonic acid | < 0.05 | < 0.05 | < 0.05 | NA  |
| Sum Target PFAS              | 0.42   | 0.20   | 0.31   | 72% |

| Surrogate PFAS               |     |     |     |      |
|------------------------------|-----|-----|-----|------|
| Perfluorobutanesulfonic acid | 68% | 78% | 73% | 14%  |
| Perfluorohexanoic acid       | 65% | 84% | 75% | 26%  |
| Perfluoroheptanoic acid      | 71% | 84% | 78% | 17%  |
| Perfluorooctanoic acid       | 62% | 89% | 76% | 36%  |
| Perfluorononanoic acid       | 67% | 50% | 59% | 29%  |
| Perfluorodecanoic acid       | 30% | 31% | 31% | 3.3% |
| Perfluorooctanesulfonic acid | 43% | 39% | 41% | 10%  |
| Average Surrogate Recovery   | 58% | 65% | 62% | 19%  |

NA - Not Applicable

**Table S10 : Final Target Per- and polyfluoroalkyl Substances (PFAS) - Polyester Deployed for 1 Month - Channel Water**  
**Matrix: Polyester (PET)**  
**Date Extracted: 5/6/2019**  
**Data Analyzed: 8/29/2019**  
**Sample Prep: Solid-Liquid Extraction**  
**Instrument: Waters Quattro Micro LC-Tandem Mass Spectrometer**

| Identification | PET - Channel Water #1 | PET - Channel Water #2 | Average | %RPD |
|----------------|------------------------|------------------------|---------|------|
|----------------|------------------------|------------------------|---------|------|

| Units | ng/g | ng/g | ng/g |  |
|-------|------|------|------|--|
|-------|------|------|------|--|

| Native PFAS                  |        |        |        |     |
|------------------------------|--------|--------|--------|-----|
| Perfluorobutanesulfonic acid | < 0.05 | < 0.05 | < 0.05 | NA  |
| Perfluorohexanoic acid       | 0.099  | 0.079  | 0.089  | 22% |
| Perfluoroheptanoic acid      | 0.089  | 0.060  | 0.089  | 33% |
| Perfluorooctanoic acid       | 0.10   | 0.075  | 0.088  | 30% |
| Perfluorononanoic acid       | < 0.05 | < 0.05 | < 0.05 | NA  |
| Perfluorodecanoic acid       | < 0.05 | < 0.05 | < 0.05 | NA  |
| Perfluorooctanesulfonic acid | < 0.05 | < 0.05 | < 0.05 | NA  |
| Sum Target PFAS              | 0.29   | 0.15   | 0.22   | 61% |

| Surrogate PFAS               |     |     |     |      |
|------------------------------|-----|-----|-----|------|
| Perfluorobutanesulfonic acid | 78% | 66% | 72% | 17%  |
| Perfluorohexanoic acid       | 71% | 63% | 67% | 12%  |
| Perfluoroheptanoic acid      | 79% | 67% | 73% | 16%  |
| Perfluorooctanoic acid       | 79% | 67% | 73% | 16%  |
| Perfluorononanoic acid       | 53% | 53% | 53% | 0.0% |
| Perfluorodecanoic acid       | 24% | 25% | 25% | 4.1% |
| Perfluorooctanesulfonic acid | 53% | 46% | 50% | 14%  |
| Average Surrogate Recovery   | 62% | 55% | 59% | 11%  |

NA - Not Applicable



**Table S11 : Final Target Per- and polyfluoroalkyl Substances (PFAS) - Polyethylene Deployed for 1 Month - Channel Bottom**  
**Matrix: Polyethylene (PE)**  
**Date Extracted: 5/6/2019**  
**Sample Prep: Solid-Liquid Extraction**  
**Data Analyzed: 8/29/2019 & 9/23/2019**  
**Instrument: Waters Quattro Micro LC-Tandem Mass Spectrometer**

| Identification | PE - Channel Bottom #1 | PE - Channel Bottom #2 | Average | %RPD |
|----------------|------------------------|------------------------|---------|------|
|----------------|------------------------|------------------------|---------|------|

| Units | ng/g | ng/g | ng/g |  |
|-------|------|------|------|--|
|-------|------|------|------|--|

| Native PFAS                  |        |        |        |     |
|------------------------------|--------|--------|--------|-----|
| Perfluorobutanesulfonic acid | < 0.05 | < 0.05 | < 0.05 | NA  |
| Perfluorohexanoic acid       | < 0.05 | 0.065  | 0.065  | NA  |
| Perfluoroheptanoic acid      | < 0.05 | < 0.05 | < 0.05 | NA  |
| Perfluorooctanoic acid       | 0.21   | 0.11   | 0.16   | 61% |
| Perfluorononanoic acid       | < 0.05 | < 0.05 | < 0.05 | NA  |
| Perfluorodecanoic acid       | < 0.05 | < 0.05 | < 0.05 | NA  |
| Perfluorooctanesulfonic acid | < 0.05 | < 0.05 | < 0.05 | NA  |
| Sum Target PFAS              | 0.21   | 0.18   | 0.19   | 18% |

| Surrogate PFAS               |     |     |     |      |
|------------------------------|-----|-----|-----|------|
| Perfluorobutanesulfonic acid | 81% | 82% | 82% | 1.2% |
| Perfluorohexanoic acid       | 81% | 93% | 87% | 14%  |
| Perfluoroheptanoic acid      | 78% | 67% | 73% | 15%  |
| Perfluorooctanoic acid       | 62% | 54% | 58% | 14%  |
| Perfluorononanoic acid       | 28% | 40% | 34% | 37%  |
| Perfluorodecanoic acid       | 11% | 14% | 12% | 29%  |
| Perfluorooctanesulfonic acid | 37% | 58% | 48% | 44%  |
| Average Surrogate Recovery   | 54% | 58% | 56% | 22%  |

NA - Not Applicable

**Table S12 : Final Target Per- and polyfluoroalkyl Substances (PFAS) - Polypropylene Deployed for 1 Month - Channel Bottom**  
**Matrix: Polypropylene (PP)**  
**Date Extracted: 5/6/2019**  
**Data Analyzed: 8/29/2019**  
**Sample Prep: Solid-Liquid Extraction**  
**Instrument: Waters Quattro Micro LC-Tandem Mass Spectrometer**

| Identification | PP - Channel Bottom #1 | PP - Channel Bottom #2 | Average | %RPD |
|----------------|------------------------|------------------------|---------|------|
|----------------|------------------------|------------------------|---------|------|

| Units | ng/g | ng/g | ng/g |  |
|-------|------|------|------|--|
|-------|------|------|------|--|

| Native PFAS                  |        |        |        |      |
|------------------------------|--------|--------|--------|------|
| Perfluorobutanesulfonic acid | < 0.05 | < 0.05 | < 0.05 | NA   |
| Perfluorohexanoic acid       | < 0.05 | 0.0722 | 0.072  | NA   |
| Perfluoroheptanoic acid      | 0.095  | 0.0583 | 0.077  | 48%  |
| Perfluorooctanoic acid       | 0.10   | 0.1000 | 0.10   | 1.1% |
| Perfluorononanoic acid       | < 0.05 | < 0.05 | < 0.05 | NA   |
| Perfluorodecanoic acid       | < 0.05 | < 0.05 | < 0.05 | NA   |
| Perfluorooctanesulfonic acid | < 0.05 | < 0.05 | < 0.05 | NA   |
| Sum Target PFAS              | 0.20   | 0.23   | 0.21   | 16%  |

| Surrogate PFAS               |     |      |     |      |
|------------------------------|-----|------|-----|------|
| Perfluorobutanesulfonic acid | 78% | 116% | 97% | 39%  |
| Perfluorohexanoic acid       | 84% | 97%  | 91% | 14%  |
| Perfluoroheptanoic acid      | 84% | 103% | 94% | 20%  |
| Perfluorooctanoic acid       | 89% | 100% | 95% | 12%  |
| Perfluorononanoic acid       | 50% | 46%  | 48% | 8.3% |
| Perfluorodecanoic acid       | 31% | 21%  | 26% | 38%  |
| Perfluorooctanesulfonic acid | 39% | 47%  | 43% | 19%  |
| Average Surrogate Recovery   | 65% | 76%  | 70% | 22%  |

NA - Not Applicable

**Table S13 : Final Target Per- and polyfluoroalkyl Substances (PFAS) - Polyester Deployed for 1 Month - Channel Bottom**  
**Matrix: Polyester (PET)**  
**Date Extracted: 5/6/2019**  
**Data Analyzed: 8/29/2019**  
**Sample Prep: Solid-Liquid Extraction**  
**Instrument: Waters Quattro Micro LC-Tandem Mass Spectrometer**

| Identification               | PET - Channel Bottom #1 | PET - Channel Bottom #2 | Average     | %RPD |
|------------------------------|-------------------------|-------------------------|-------------|------|
| <b>Units</b>                 | <b>ng/g</b>             | <b>ng/g</b>             | <b>ng/g</b> |      |
| <b>Native PFAS</b>           |                         |                         |             |      |
| Perfluorobutanesulfonic acid | < 0.05                  | < 0.05                  | < 0.05      | NA   |
| Perfluorohexanoic acid       | 0.11                    | < 0.05                  | 0.11        | NA   |
| Perfluoroheptanoic acid      | 0.10                    | 0.10                    | 0.10        | 0.0% |
| Perfluorooctanoic acid       | 0.10                    | 0.14                    | 0.12        | 29%  |
| Perfluorononanoic acid       | < 0.05                  | < 0.05                  | < 0.05      | NA   |
| Perfluorodecanoic acid       | < 0.05                  | < 0.05                  | < 0.05      | NA   |
| Perfluorooctanesulfonic acid | < 0.05                  | < 0.05                  | < 0.05      | NA   |
| Sum Target PFAS              | 0.31                    | 0.24                    | 0.27        | 26%  |
| <b>Surrogate PFAS</b>        |                         |                         |             |      |
| Perfluorobutanesulfonic acid | 63%                     | 54%                     | 59%         | 15%  |
| Perfluorohexanoic acid       | 57%                     | 54%                     | 56%         | 5.4% |
| Perfluoroheptanoic acid      | 70%                     | 60%                     | 65%         | 15%  |
| Perfluorooctanoic acid       | 78%                     | 58%                     | 68%         | 29%  |
| Perfluorononanoic acid       | 35%                     | 43%                     | 39%         | 21%  |
| Perfluorodecanoic acid       | 13%                     | 18%                     | 16%         | 32%  |
| Perfluorooctanesulfonic acid | 42%                     | 39%                     | 41%         | 7.4% |
| Average Surrogate Recovery   | 51%                     | 47%                     | 49%         | 18%  |

NA - Not Applicable



|                                                                                                                                                                                                                                                                                                                                                                 |  |  |  |
|-----------------------------------------------------------------------------------------------------------------------------------------------------------------------------------------------------------------------------------------------------------------------------------------------------------------------------------------------------------------|--|--|--|
| <b>Table S14 : Final Target Per- and polyfluoroalkyl Substances (PFAS) - Polyethylene Deployed for 1 Month - Lake Bottom</b><br><b>Matrix: Polyethylene (PE)</b><br><b>Date Extracted: 04/30/2019</b><br><b>Data Analyzed: 08/29/2019</b><br><b>Sample Prep: Solid-Liquid Extraction</b><br><b>Instrument: Waters Quattro Micro LC-Tandem Mass Spectrometer</b> |  |  |  |
|-----------------------------------------------------------------------------------------------------------------------------------------------------------------------------------------------------------------------------------------------------------------------------------------------------------------------------------------------------------------|--|--|--|

| Identification | PE - Lake Bottom #1 | PE - Lake Bottom #2 | Average | %RPD |
|----------------|---------------------|---------------------|---------|------|
|----------------|---------------------|---------------------|---------|------|

| Units | ng/g | ng/g | ng/g |  |
|-------|------|------|------|--|
|-------|------|------|------|--|

| Native PFAS                  |        |        |        |      |
|------------------------------|--------|--------|--------|------|
| Perfluorobutanesulfonic acid | < 0.05 | < 0.05 | < 0.05 | NA   |
| Perfluorohexanoic acid       | 0.081  | < 0.05 | 0.081  | NA   |
| Perfluoroheptanoic acid      | 0.063  | 0.059  | 0.063  | 6.4% |
| Perfluorooctanoic acid       | 0.13   | 0.29   | 0.21   | 75%  |
| Perfluorononanoic acid       | < 0.05 | < 0.05 | < 0.05 | NA   |
| Perfluorodecanoic acid       | < 0.05 | < 0.05 | < 0.05 | NA   |
| Perfluorooctanesulfonic acid | < 0.05 | < 0.05 | < 0.05 | NA   |
| Sum Target PFAS              | 0.28   | 0.35   | 0.32   | 24%  |

| Surrogate PFAS               |      |     |     |      |
|------------------------------|------|-----|-----|------|
| Perfluorobutanesulfonic acid | 73%  | 66% | 69% | 11%  |
| Perfluorohexanoic acid       | 74%  | 69% | 71% | 7.7% |
| Perfluoroheptanoic acid      | 79%  | 68% | 73% | 16%  |
| Perfluorooctanoic acid       | 105% | 68% | 87% | 43%  |
| Perfluorononanoic acid       | 60%  | 27% | 43% | 77%  |
| Perfluorodecanoic acid       | 30%  | 13% | 22% | 79%  |
| Perfluorooctanesulfonic acid | 69%  | 36% | 53% | 63%  |
| Average Surrogate Recovery   | 70%  | 49% | 60% | 42%  |

NA - Not Applicable

**Table S15 : Final Target Per- and polyfluoroalkyl Substances (PFAS) - Polypropylene Deployed for 1 Month - Lake Bottom**  
**Matrix: Polypropylene (PP)**  
**Date Extracted: 04/30/2019**  
**Data Analyzed: 08/29/2019**  
**Sample Prep: Solid-Liquid Extraction**  
**Instrument: Waters Quattro Micro LC-Tandem Mass Spectrometer**

| Identification | PP - Lake Bottom #1 | PP - Lake Bottom #2 | Average | %RPD |
|----------------|---------------------|---------------------|---------|------|
|----------------|---------------------|---------------------|---------|------|

| Units | ng/g | ng/g | ng/g |
|-------|------|------|------|
|-------|------|------|------|

| Native PFAS                  |        |        |        |
|------------------------------|--------|--------|--------|
| Perfluorobutanesulfonic acid | < 0.05 | < 0.05 | < 0.05 |
| Perfluorohexanoic acid       | 0.085  | < 0.05 | 0.085  |
| Perfluorooheptanoic acid     | < 0.05 | < 0.05 | < 0.05 |
| Perfluorooctanoic acid       | 0.11   | 0.15   | 0.13   |
| Perfluorononanoic acid       | < 0.05 | < 0.05 | < 0.05 |
| Perfluorodecanoic acid       | < 0.05 | < 0.05 | < 0.05 |
| Perfluorooctanesulfonic acid | < 0.05 | < 0.05 | < 0.05 |
| Sum Target PFAS              | 0.19   | 0.15   | 0.17   |
|                              |        |        | 26%    |

| Surrogate PFAS               |     |     |     |
|------------------------------|-----|-----|-----|
| Perfluorobutanesulfonic acid | 71% | 75% | 73% |
| Perfluorohexanoic acid       | 71% | 69% | 70% |
| Perfluorooheptanoic acid     | 74% | 70% | 72% |
| Perfluorooctanoic acid       | 60% | 65% | 63% |
| Perfluorononanoic acid       | 45% | 53% | 49% |
| Perfluorodecanoic acid       | 14% | 17% | 16% |
| Perfluorooctanesulfonic acid | 53% | 60% | 57% |
| Average Surrogate Recovery   | 55% | 58% | 57% |
|                              |     |     | 10% |

NA - Not Applicable

**Table S16 : Final Target Per- and polyfluoroalkyl Substances (PFAS) - Polyester Deployed for 1 Month - Lake Bottom**  
**Matrix: Polyester (PET)**  
**Date Extracted: 04/30/2019**  
**Data Analyzed: 08/29/2019**  
**Sample Prep: Solid-Liquid Extraction**  
**Instrument: Waters Quattro Micro LC-Tandem Mass Spectrometer**

| Identification | PET - Lake Bottom #1 | PET - Lake Bottom #2 | Average | %RPD |
|----------------|----------------------|----------------------|---------|------|
|----------------|----------------------|----------------------|---------|------|

| Units | ng/g | ng/g | ng/g |  |
|-------|------|------|------|--|
|-------|------|------|------|--|

| Native PFAS                  |        |        |        |     |
|------------------------------|--------|--------|--------|-----|
| Perfluorobutanesulfonic acid | < 0.05 | < 0.05 | < 0.05 | NA  |
| Perfluorohexanoic acid       | < 0.05 | 0.093  | 0.093  | NA  |
| Perfluoroheptanoic acid      | 0.12   | 0.18   | 0.12   | 48% |
| Perfluorooctanoic acid       | 0.11   | 0.18   | 0.15   | 43% |
| Perfluorononanoic acid       | < 0.05 | < 0.05 | < 0.05 | NA  |
| Perfluorodecanoic acid       | < 0.05 | < 0.05 | < 0.05 | NA  |
| Perfluorooctanesulfonic acid | < 0.05 | < 0.05 | < 0.05 | NA  |
| Sum Target PFAS              | 0.23   | 0.27   | 0.24   | 14% |

| Surrogate PFAS               |     |     |     |      |
|------------------------------|-----|-----|-----|------|
| Perfluorobutanesulfonic acid | 77% | 65% | 71% | 17%  |
| Perfluorohexanoic acid       | 67% | 53% | 60% | 23%  |
| Perfluoroheptanoic acid      | 67% | 54% | 61% | 21%  |
| Perfluorooctanoic acid       | 79% | 51% | 65% | 43%  |
| Perfluorononanoic acid       | 40% | 34% | 37% | 16%  |
| Perfluorodecanoic acid       | 26% | 21% | 24% | 21%  |
| Perfluorooctanesulfonic acid | 46% | 48% | 47% | 4.3% |
| Average Surrogate Recovery   | 57% | 47% | 52% | 21%  |

NA - Not Applicable



**Table S17: Per- and polyfluoroalkyl Substances (PFAS) Quality Control Summary - 1-Month Deployed Plastics**

| Identification               |       | .         | PE - Lake Bottom | PE - Channel Bottom | PP - Lake Bottom |
|------------------------------|-------|-----------|------------------|---------------------|------------------|
|                              | ng/g  | %Recovery | %Recovery        | %RPD                | %Recovery        |
| Perfluorobutanesulfonic acid | <0.05 | 88%       | 89%              | NC1                 | 108%             |
| Perfluorohexanoic acid       | <0.05 | 80%       | 85%              | NC1                 | 58%              |
| Perfluorooctanoic acid       | <0.05 | 119%      | 88%              | NC1                 | 136%             |
| Perfluorooctanoic acid       | <0.05 | 69%       | 73%              | 26%                 | 53%              |
| Perfluorononanoic acid       | <0.05 | 107%      | 89%              | NC1                 | 127%             |
| Perfluorodecanoic acid       | <0.05 | 138%      | 80%              | NC1                 | 80%              |
| Perfluorooctanesulfonic acid | <0.05 | 86%       | 85%              | NC1                 | 140%             |
| Average Recovery & RPD       | NA    | 98%       | 84%              | 26%                 | 100%             |
| Standard Deviation           | NA    | 24%       | 5.8%             | NA                  | 37%              |

NA - Not Applicable

NC1 - Not calculated, less than detection limit.

**Table S18 : Final Target Per- and polyfluoroalkyl Substances (PFAS) - Polyethylene Deployed for 3 Months - Channel Water**  
**Matrix: Polyethylene (PE)**  
**Date Extracted: 3/20/2019 & 5/6/2019**  
**Sample Prep: Solid-Liquid Extraction**  
**Data Analyzed: 07/01/2019 & 08/12/19**  
**Instrument: Waters Quattro Micro LC-Tandem Mass Spectrometer**

| Identification | PE - Channel Water #1 | PE - Channel Water #2 | Average | %RPD |
|----------------|-----------------------|-----------------------|---------|------|
|----------------|-----------------------|-----------------------|---------|------|

| Units | ng/g | ng/g | ng/g |  |
|-------|------|------|------|--|
|-------|------|------|------|--|

| Native PFAS                  |        |        |        |      |
|------------------------------|--------|--------|--------|------|
| Perfluorobutanesulfonic acid | < 0.05 | < 0.05 | < 0.05 | NA   |
| Perfluorohexanoic acid       | 0.11   | 0.11   | 0.11   | 4.3% |
| Perfluoroheptanoic acid      | 0.20   | < 0.05 | 0.20   | NA   |
| Perfluorooctanoic acid       | 0.55   | 0.39   | 0.47   | 34%  |
| Perfluorononanoic acid       | < 0.05 | < 0.05 | < 0.05 | NA   |
| Perfluorodecanoic acid       | < 0.05 | < 0.05 | < 0.05 | NA   |
| Perfluorooctanesulfonic acid | < 0.05 | 0.10   | 0.10   | NA   |
| Sum Target PFAS              | 0.87   | 0.60   | 0.73   | 37%  |

| Surrogate PFAS               |      |     |      |     |
|------------------------------|------|-----|------|-----|
| Perfluorobutanesulfonic acid | 94%  | 66% | 80%  | 35% |
| Perfluorohexanoic acid       | 88%  | 64% | 76%  | 32% |
| Perfluoroheptanoic acid      | 84%  | 64% | 74%  | 28% |
| Perfluorooctanoic acid       | 68%  | 56% | 62%  | 20% |
| Perfluorononanoic acid       | 27%  | 34% | 30%  | 23% |
| Perfluorodecanoic acid       | 6.5% | 12% | 9.0% | 56% |
| Perfluorooctanesulfonic acid | 41%  | 42% | 41%  | 2%  |
| Average Surrogate Recovery   | 58%  | 48% | 53%  | 28% |

NA - Not Applicable

**Table S19 : Final Target Per- and polyfluoroalkyl Substances (PFAS) - Polypropylene Deployed for 3 Months - Channel Water**  
**Matrix: Polypropylene (PP)**  
**Date Extracted: 3/20/2019 & 5/6/2019**  
**Sample Prep: Solid-Liquid Extraction**  
**Data Analyzed: 07/01/2019 & 08/12/19**  
**Instrument: Waters Quattro Micro LC-Tandem Mass Spectrometer**

| Identification | PP - Channel Water #1 | PP - Channel Water #2 | Average | %RPD |
|----------------|-----------------------|-----------------------|---------|------|
|----------------|-----------------------|-----------------------|---------|------|

| Units | ng/g | ng/g | ng/g |  |
|-------|------|------|------|--|
|-------|------|------|------|--|

| Native PFAS                  |        |        |        |      |
|------------------------------|--------|--------|--------|------|
| Perfluorobutanesulfonic acid | < 0.05 | < 0.05 | < 0.05 | NA   |
| Perfluorohexanoic acid       | 0.054  | 0.058  | 0.056  | 6.5% |
| Perfluoroheptanoic acid      | 0.051  | < 0.05 | 0.051  | NA   |
| Perfluorooctanoic acid       | 0.081  | 0.086  | 0.083  | 6.7% |
| Perfluorononanoic acid       | < 0.05 | < 0.05 | < 0.05 | NA   |
| Perfluorodecanoic acid       | < 0.05 | < 0.05 | < 0.05 | NA   |
| Perfluorooctanesulfonic acid | < 0.05 | < 0.05 | < 0.05 | NA   |
| Sum Target PFAS              | 0.19   | 0.14   | 0.17   | 25%  |

| Surrogate PFAS               |      |     |     |      |
|------------------------------|------|-----|-----|------|
| Perfluorobutanesulfonic acid | 106% | 92% | 99% | 15%  |
| Perfluorohexanoic acid       | 73%  | 68% | 70% | 7.8% |
| Perfluoroheptanoic acid      | 58%  | 56% | 57% | 2.6% |
| Perfluorooctanoic acid       | 54%  | 46% | 50% | 17%  |
| Perfluorononanoic acid       | 68%  | 72% | 70% | 5.7% |
| Perfluorodecanoic acid       | 10%  | 13% | 11% | 27%  |
| Perfluorooctanesulfonic acid | 67%  | 69% | 68% | 3.0% |
| Average Surrogate Recovery   | 62%  | 59% | 61% | 11%  |

NA - Not Applicable



**Table S20: Final Target Per- and polyfluoroalkyl Substances (PFAS) - Polyester Deployed for 3 Months - Channel Water**  
**Matrix: Polyester (PET)**  
**Date Extracted: 3/20/2019 & 5/6/2019**  
**Data Analyzed: 07/01/2019 & 08/12/19**  
**Sample Prep: Solid-Liquid Extraction**  
**Instrument: Waters Quattro Micro LC-Tandem Mass Spectrometer**

| Identification | PET - Channel Water #1 | PET - Channel Water #2 | Average | %RPD |
|----------------|------------------------|------------------------|---------|------|
|----------------|------------------------|------------------------|---------|------|

| Units | ng/g | ng/g | ng/g |  |
|-------|------|------|------|--|
|-------|------|------|------|--|

| Native PFAS                  |        |        |        |      |
|------------------------------|--------|--------|--------|------|
| Perfluorobutanesulfonic acid | < 0.05 | < 0.05 | < 0.05 | NA   |
| Perfluorohexanoic acid       | < 0.05 | < 0.05 | < 0.05 | NA   |
| Perfluoroheptanoic acid      | < 0.05 | 0.059  | < 0.05 | NA   |
| Perfluorooctanoic acid       | 0.062  | 0.20   | 0.13   | 106% |
| Perfluorononanoic acid       | < 0.05 | < 0.05 | < 0.05 | NA   |
| Perfluorodecanoic acid       | < 0.05 | < 0.05 | < 0.05 | NA   |
| Perfluorooctanesulfonic acid | < 0.05 | < 0.05 | < 0.05 | NA   |
| Sum Target PFAS              | 0.062  | 0.26   | 0.16   | 123% |

| Surrogate PFAS               |     |      |      |      |
|------------------------------|-----|------|------|------|
| Perfluorobutanesulfonic acid | 82% | 128% | 105% | 44%  |
| Perfluorohexanoic acid       | 47% | 60%  | 53%  | 25%  |
| Perfluoroheptanoic acid      | 37% | 50%  | 43%  | 31%  |
| Perfluorooctanoic acid       | 30% | 35%  | 32%  | 14%  |
| Perfluorononanoic acid       | 25% | 28%  | 26%  | 13%  |
| Perfluorodecanoic acid       | 11% | 5.5% | 8.0% | 63%  |
| Perfluorooctanesulfonic acid | 27% | 28%  | 27%  | 1.8% |
| Average Surrogate Recovery   | 37% | 48%  | 42%  | 28%  |

NA - Not Applicable

|                                                                                                                                                                                                                                                                                                                                                                                                 |  |  |  |
|-------------------------------------------------------------------------------------------------------------------------------------------------------------------------------------------------------------------------------------------------------------------------------------------------------------------------------------------------------------------------------------------------|--|--|--|
| <b>Table S21: Final Target Per- and polyfluoroalkyl Substances (PFAS) - Polyethylene Deployed for 3 Months - Channel Bottom</b><br><b>Matrix: Polyethylene (PE)</b><br><b>Date Extracted: 3/20/2019 &amp; 5/6/2019</b><br><b>Sample Prep: Solid-Liquid Extraction</b><br><b>Data Analyzed: 07/01/2019 &amp; 08/12/19</b><br><b>Instrument: Waters Quattro Micro LC-Tandem Mass Spectrometer</b> |  |  |  |
|-------------------------------------------------------------------------------------------------------------------------------------------------------------------------------------------------------------------------------------------------------------------------------------------------------------------------------------------------------------------------------------------------|--|--|--|

| Identification | PE - Channel Bottom #1 | PE - Channel Bottom #2 | Average | %RPD |
|----------------|------------------------|------------------------|---------|------|
|----------------|------------------------|------------------------|---------|------|

| Units | ng/g | ng/g | ng/g |  |
|-------|------|------|------|--|
|-------|------|------|------|--|

| Native PFAS                  |        |        |        |     |
|------------------------------|--------|--------|--------|-----|
| Perfluorobutanesulfonic acid | < 0.05 | < 0.05 | < 0.05 | NA  |
| Perfluorohexanoic acid       | 0.10   | 0.062  | 0.081  | 48% |
| Perfluoroheptanoic acid      | 0.066  | 0.051  | 0.066  | 23% |
| Perfluorooctanoic acid       | 0.27   | 0.098  | 0.18   | 93% |
| Perfluorononanoic acid       | < 0.05 | < 0.05 | < 0.05 | NA  |
| Perfluorodecanoic acid       | < 0.05 | < 0.05 | < 0.05 | NA  |
| Perfluorooctanesulfonic acid | < 0.05 | < 0.05 | < 0.05 | NA  |
| Sum Target PFAS              | 0.43   | 0.21   | 0.32   | 69% |

| Surrogate PFAS               |      |      |      |      |
|------------------------------|------|------|------|------|
| Perfluorobutanesulfonic acid | 122% | 129% | 126% | 5.6% |
| Perfluorohexanoic acid       | 88%  | 86%  | 87%  | 1.7% |
| Perfluoroheptanoic acid      | 81%  | 104% | 92%  | 25%  |
| Perfluorooctanoic acid       | 63%  | 90%  | 77%  | 35%  |
| Perfluorononanoic acid       | 34%  | 43%  | 38%  | 22%  |
| Perfluorodecanoic acid       | 8.5% | 11%  | 9.5% | 21%  |
| Perfluorooctanesulfonic acid | 25%  | 27%  | 26%  | 7.8% |
| Average Surrogate Recovery   | 60%  | 70%  | 65%  | 17%  |

NA - Not Applicable

**Table S22 : Final Target Per- and polyfluoroalkyl Substances (PFAS) - Polypropylene Deployed for 3 Months - Channel Bottom**  
**Matrix: Polypropylene (PP)**  
**Date Extracted: 3/20/2019 & 5/6/2019**  
**Sample Prep: Solid-Liquid Extraction**  
**Data Analyzed: 9/23/219**  
**Instrument: Waters Quattro Micro LC-Tandem Mass Spectrometer**

| Identification               | PP - Channel Bottom #1 | PP - Channel Bottom #2 | Average     | %RPD |
|------------------------------|------------------------|------------------------|-------------|------|
| <b>Units</b>                 | <b>ng/g</b>            | <b>ng/g</b>            | <b>ng/g</b> |      |
| <b>Native PFAS</b>           |                        |                        |             |      |
| Perfluorobutanesulfonic acid | < 0.05                 | < 0.05                 | < 0.05      | NA   |
| Perfluorohexanoic acid       | < 0.05                 | < 0.05                 | < 0.05      | NA   |
| Perfluoroheptanoic acid      | < 0.05                 | < 0.05                 | < 0.05      | NA   |
| Perfluorooctanoic acid       | 0.083                  | 0.052                  | 0.067       | 47%  |
| Perfluorononanoic acid       | < 0.05                 | < 0.05                 | < 0.05      | NA   |
| Perfluorodecanoic acid       | < 0.05                 | < 0.05                 | < 0.05      | NA   |
| Perfluorooctanesulfonic acid | < 0.05                 | < 0.05                 | < 0.05      | NA   |
| Sum Target PFAS              | 0.083                  | 0.052                  | 0.067       | 47%  |
| <b>Surrogate PFAS</b>        |                        |                        |             |      |
| Perfluorobutanesulfonic acid | 69%                    | 53%                    | 61%         | 26%  |
| Perfluorohexanoic acid       | 60%                    | 55%                    | 57%         | 10%  |
| Perfluoroheptanoic acid      | 67%                    | 52%                    | 60%         | 25%  |
| Perfluorooctanoic acid       | 72%                    | 78%                    | 75%         | 8%   |
| Perfluorononanoic acid       | 77%                    | 78%                    | 78%         | 1.3% |
| Perfluorodecanoic acid       | 15%                    | 10%                    | 12%         | 37%  |
| Perfluorooctanesulfonic acid | 73%                    | 68%                    | 70%         | 6.4% |
| Average Surrogate Recovery   | 62%                    | 56%                    | 59%         | 16%  |

NA - Not Applicable



**Table S23 : Final Target Per- and polyfluoroalkyl Substances (PFAS) - Polyester Deployed for 3 Months - Channel Bottom**  
**Matrix: Polyester (PET)**  
**Date Extracted: 3/20/2019 & 5/6/2019**  
**Data Analyzed: 07/01/2019 & 08/12/19**  
**Sample Prep: Solid-Liquid Extraction**  
**Instrument: Waters Quattro Micro LC-Tandem Mass Spectrometer**

| Identification | PET - Channel Bottom #1 | PET - Channel Bottom #2 | Average | %RPD |
|----------------|-------------------------|-------------------------|---------|------|
|----------------|-------------------------|-------------------------|---------|------|

| Units | ng/g | ng/g | ng/g |  |
|-------|------|------|------|--|
|-------|------|------|------|--|

| Native PFAS                  |        |        |        |     |
|------------------------------|--------|--------|--------|-----|
| Perfluorobutanesulfonic acid | 0.078  | < 0.05 | 0.078  | NA  |
| Perfluorohexanoic acid       | < 0.05 | < 0.05 | < 0.05 | NA  |
| Perfluoroheptanoic acid      | 0.18   | 0.16   | 0.18   | 12% |
| Perfluorooctanoic acid       | 0.059  | 0.072  | 0.065  | 20% |
| Perfluorononanoic acid       | 0.14   | 0.25   | 0.20   | 57% |
| Perfluorodecanoic acid       | < 0.05 | < 0.05 | < 0.05 | NA  |
| Perfluorooctanesulfonic acid | < 0.05 | < 0.05 | < 0.05 | NA  |
| Sum Target PFAS              | 0.38   | 0.48   | 0.43   | 24% |

| Surrogate PFAS               |      |     |      |      |
|------------------------------|------|-----|------|------|
| Perfluorobutanesulfonic acid | 96%  | 92% | 94%  | 3.7% |
| Perfluorohexanoic acid       | 119% | 81% | 100% | 39%  |
| Perfluoroheptanoic acid      | 99%  | 76% | 87%  | 26%  |
| Perfluorooctanoic acid       | 88%  | 70% | 79%  | 23%  |
| Perfluorononanoic acid       | 63%  | 56% | 59%  | 13%  |
| Perfluorodecanoic acid       | 29%  | 36% | 32%  | 22%  |
| Perfluorooctanesulfonic acid | 60%  | 47% | 53%  | 25%  |
| Average Surrogate Recovery   | 79%  | 65% | 72%  | 22%  |

NA - Not Applicable

| Table S24 : Final Target Per- and polyfluoroalkyl Substances (PFAS) - Polyethylene Deployed for 3 Months - Lake Bottom |  |  |  |
|------------------------------------------------------------------------------------------------------------------------|--|--|--|
| Matrix: Polyethylene (PE)                                                                                              |  |  |  |
| Sample Prep: Solid-Liquid Extraction                                                                                   |  |  |  |
| Instrument: Waters Quattro Micro LC-Tandem Mass Spectrometer                                                           |  |  |  |
| Date Extracted: 3/20/2019 & 5/6/2019                                                                                   |  |  |  |
| Data Analyzed: 07/01/2019 & 08/12/19                                                                                   |  |  |  |

| Identification | PE - Lake Bottom #1 | PE - Lake Bottom #2 | Average | %RPD |
|----------------|---------------------|---------------------|---------|------|
|----------------|---------------------|---------------------|---------|------|

| Units | ng/g | ng/g | ng/g |  |
|-------|------|------|------|--|
|-------|------|------|------|--|

| Native PFAS                  |        |        |        |      |
|------------------------------|--------|--------|--------|------|
| Perfluorobutanesulfonic acid | < 0.05 | < 0.05 | < 0.05 | NA   |
| Perfluorohexanoic acid       | 0.076  | < 0.05 | 0.076  | NA   |
| Perfluoroheptanoic acid      | 0.069  | < 0.05 | 0.069  | NA   |
| Perfluorooctanoic acid       | 0.11   | 0.10   | 0.11   | 4.9% |
| Perfluorononanoic acid       | < 0.05 | < 0.05 | < 0.05 | NA   |
| Perfluorodecanoic acid       | < 0.05 | < 0.05 | < 0.05 | NA   |
| Perfluorooctanesulfonic acid | < 0.05 | 0.069  | 0.069  | NA   |
| Sum Target PFAS              | 0.26   | 0.17   | 0.21   | 38%  |

| Surrogate PFAS               |           |           |         |
|------------------------------|-----------|-----------|---------|
|                              | %Recovery | %Recovery | Average |
| Perfluorobutanesulfonic acid | 97%       | 70%       | 84%     |
| Perfluorohexanoic acid       | 79%       | 71%       | 75%     |
| Perfluoroheptanoic acid      | 72%       | 72%       | 72%     |
| Perfluorooctanoic acid       | 91%       | 86%       | 89%     |
| Perfluorononanoic acid       | 120%      | 96%       | 108%    |
| Perfluorodecanoic acid       | 65%       | 52%       | 59%     |
| Perfluorooctanesulfonic acid | 79%       | 72%       | 76%     |
| Average Surrogate Recovery   | 86%       | 74%       | 80%     |

NA - Not Applicable

**Table S25 : Final Target Per- and polyfluoroalkyl Substances (PFAS) - Polypropylene Deployed for 3 Months - Lake Bottom**  
**Matrix: Polypropylene (PP)**  
**Date Extracted: 3/20/2019 & 5/6/2019**  
**Sample Prep: Solid-Liquid Extraction**  
**Data Analyzed: 9/23/219**  
**Instrument: Waters Quattro Micro LC-Tandem Mass Spectrometer**

| Identification | PP - Lake Bottom #1 | PP - Lake Bottom #2 | Average | %RPD |
|----------------|---------------------|---------------------|---------|------|
|----------------|---------------------|---------------------|---------|------|

| Units | ng/g | ng/g | ng/g |  |
|-------|------|------|------|--|
|-------|------|------|------|--|

| Native PFAS                  |        |        |        |     |
|------------------------------|--------|--------|--------|-----|
| Perfluorobutanesulfonic acid | < 0.05 | < 0.05 | < 0.05 | NA  |
| Perfluorohexanoic acid       | < 0.05 | < 0.05 | < 0.05 | NA  |
| Perfluorohexanoic acid       | < 0.05 | < 0.05 | < 0.05 | NA  |
| Perfluorooctanoic acid       | 0.12   | 0.072  | 0.10   | 49% |
| Perfluorononanoic acid       | < 0.05 | < 0.05 | < 0.05 | NA  |
| Perfluorodecanoic acid       | < 0.05 | < 0.05 | < 0.05 | NA  |
| Perfluorooctanesulfonic acid | < 0.05 | < 0.05 | < 0.05 | NA  |
| Sum Target PFAS              | 0.12   | 0.072  | 0.10   | 49% |

| Surrogate PFAS               | %Recovery | %Recovery | Average | %RPD |
|------------------------------|-----------|-----------|---------|------|
| Perfluorobutanesulfonic acid | 66%       | 77%       | 71%     | 15%  |
| Perfluorohexanoic acid       | 64%       | 65%       | 64%     | 2.3% |
| Perfluorohexanoic acid       | 60%       | 68%       | 64%     | 13%  |
| Perfluorooctanoic acid       | 51%       | 70%       | 60%     | 32%  |
| Perfluorononanoic acid       | 26%       | 32%       | 29%     | 21%  |
| Perfluorodecanoic acid       | 16%       | 17%       | 16%     | 9.2% |
| Perfluorooctanesulfonic acid | 41%       | 43%       | 42%     | 4.8% |
| Average Surrogate Recovery   | 46%       | 53%       | 50%     | 14%  |

NA - Not Applicable



| Table S26 : Final Target Per- and polyfluoroalkyl Substances (PFAS) - Polyester Deployed for 3 Months - Lake Bottom |  |                                                              |  |
|---------------------------------------------------------------------------------------------------------------------|--|--------------------------------------------------------------|--|
| Date Extracted: 3/20/2019 & 5/6/2019                                                                                |  | Matrix: Polyester (PET)                                      |  |
| Data Analyzed: 07/01/2019 & 08/12/19                                                                                |  | Sample Prep: Solid-Liquid Extraction                         |  |
|                                                                                                                     |  | Instrument: Waters Quattro Micro LC-Tandem Mass Spectrometer |  |

| Identification | PET - Lake Bottom #1 | PET - Lake Bottom #2 | Average | %RPD |
|----------------|----------------------|----------------------|---------|------|
|----------------|----------------------|----------------------|---------|------|

| Units | ng/g | ng/g | ng/g |  |
|-------|------|------|------|--|
|-------|------|------|------|--|

| Native PFAS                  |        |        |        |      |
|------------------------------|--------|--------|--------|------|
| Perfluorobutanesulfonic acid | < 0.05 | < 0.05 | < 0.05 | NA   |
| Perfluorohexanoic acid       | 0.062  | 0.059  | 0.060  | 5.4% |
| Perfluoroheptanoic acid      | < 0.05 | < 0.05 | < 0.05 | NA   |
| Perfluorooctanoic acid       | 0.14   | 0.11   | 0.13   | 25%  |
| Perfluorononanoic acid       | < 0.05 | < 0.05 | < 0.05 | NA   |
| Perfluorodecanoic acid       | < 0.05 | < 0.05 | < 0.05 | NA   |
| Perfluorooctanesulfonic acid | < 0.05 | < 0.05 | < 0.05 | NA   |
| Sum Target PFAS              | 0.20   | 0.17   | 0.19   | 19%  |

| Surrogate PFAS               |           |           |      |
|------------------------------|-----------|-----------|------|
|                              | %Recovery | %Recovery | %RPD |
| Perfluorobutanesulfonic acid | 113%      | 136%      | 19%  |
| Perfluorohexanoic acid       | 126%      | 119%      | 5.3% |
| Perfluoroheptanoic acid      | 110%      | 98%       | 12%  |
| Perfluorooctanoic acid       | 81%       | 81%       | 0.6% |
| Perfluorononanoic acid       | 41%       | 50%       | 20%  |
| Perfluorodecanoic acid       | 13%       | 15%       | 18%  |
| Perfluorooctanesulfonic acid | 30%       | 45%       | 41%  |
| Average Surrogate Recovery   | 73%       | 78%       | 16%  |

NA - Not Applicable

652

**Table S27: Per- and polyfluoroalkyl Substances (PFAS) Quality Control Summary - 3-Month Deployed Plastics**

| Identification               |       | 3-Month PP Lake Bottom | 3-Month PE Channel Bottom | 3-Month PET Lake Bottom |
|------------------------------|-------|------------------------|---------------------------|-------------------------|
|                              |       | -                      |                           |                         |
|                              | ng/g  | %Recovery              | %RPD                      | %Recovery               |
|                              |       |                        |                           |                         |
| Perfluorobutanesulfonic acid | <0.05 | 108%                   | NC1                       | 129%                    |
| Perfluorohexanoic acid       | <0.05 | 101%                   | 18%                       | 92%                     |
| Perfluorohexanoic acid       | <0.05 | 103%                   | 0.0%                      | 85%                     |
| Perfluorooctanoic acid       | <0.05 | 110%                   | 30%                       | 77%                     |
| Perfluorononanoic acid       | <0.05 | 141%                   | NC1                       | 71%                     |
| Perfluorodecanoic acid       | <0.05 | 106%                   | NC1                       | 78%                     |
| Perfluorooctanesulfonic acid | <0.05 | 105%                   | NC1                       | 93%                     |
| Average Recovery & RPD       | NA    | 111%                   | 16%                       | 89%                     |
| Standard Deviation           | NA    | 14%                    | 15%                       | 19%                     |
|                              |       |                        |                           | 20%                     |

NA - Not Applicable

NC1 - Not calculated, less than detection limit.
